# Supplementary material for: Effects of Hybridization and Evolutionary Constraints on Secondary Metabolites: The Genetic Architecture of Phenylpropanoids in European Populus Species
Source: PLoS One. 2015 May 26;10(5):e0128200. doi: 10.1371/journal.pone.0128200 (PMC4444209; doi:10.1371/journal.pone.0128200)
Supplement: S3 Table — (XLSX) [file pone.0128200.s006.xlsx]

## Sheet: Sheet1
S3 Table. Details of thirty-eight phenylpropanoids identified following Caseys et al. [1] by Ultra-High Pressure Liquid Chromatography coupled with Quadrupole-Time Of Flight mass spectrometry (UHPLC-QTOF-MS) in P. alba, P. tremula and their hybrids.
					Hybrid zones			Common Garden
Abbreviation	Name	Molecular Formula	ID Method	Deriv.	tR (min)	[M-H]- (m/z)		tR (min)	[M-H]- (m/z)	Intersp. Diff.
	Chlorogenic acids
3CfQA	3-Caffeoyl quinic acid	C16H18O9	2	b	1.3	353.087		1.29	353.087
3CmQA	3-Coumaroyl quinic acid	C16H18O8	2	b	1.56	337.093		1.53	337.093
5CfQA	5-Caffeoyl quinic acid	C16H18O9	1,2	b	1.61	353.087		1.58	353.088	-
3fQA	3-feruloyl quinic acid	C17H20O9	2		1.7	367.103		1.66	367.103	+
1CfQA	1-Caffeoyl quinic acid	C16H18O9	2	b	1.9	353.087		1.85	353.088	-
5CmQA	5-Coumaroyl quinic acid	C16H18O8	2	b	2.19	337.092		2.14	337.093	-
DiCfQA	(1,5) Dicaffeoyl quinic acid	C25H24O12	1,2	b	2.63	515.119		2.62	515.119	-
	Salicinoids
SC	Salicin	C13H18O7	1,2	a, b	1.36	285.098		1.33	285.098	+
St2	Salicortin isomer 2	C20H24O10	2	a,b	2.13	423.129		2.18	423.129
St3	Salicortin isomer3	C20H24O10	2	a	2.38	423.129		2.34	423.129
St	Salicortin	C20H24O10	1,2	a,b	2.49	423.129		2.44	423.129
Ac-St	Acetyl-salicortin	C22H26O11	2	b	2.9	465.14		2.93	465.139
Ac-St1	Acetyl-salicortin isomer 1	C22H26O11	2		2.7	465.14		2.7	465.14
Ac-St2	Acetyl-salicortin isomer 2	C22H26O11	2		3.6	465.139		3.53	465.14
HCH-St	HCH-Salicortin	C27H30O13	2	b	3.29	561.16		3.22	561.16	-
Td	Tremuloidin	C20H22O8	1,2	a,b	3.29	389.124		3.23	389.123	+
Tc1	Tremulacin isomer	C27H28O11	2	b	3.56	527.155		3.49	527.155	+
Tc	Tremulacin	C27H28O11	1,2	a,b	3.99	527.155		3.96	527.155	+
HCH-Tc	HCH-tremulacin	C34H34O14	2	a	4.58	665.186		4.51	665.186	-
Ac-Tc	Acetyl-tremulacin	C29H30O12	2	a	4.6	569.166		4.54	569.165
	Flavonoids
Cat	Catechin	C15H14O6	1,2	b	1.64	289.071		1.61	289.072
Q-rut-p	Quercetin-rutinoside-pentose	C32H38O20	2		2.08	741.187		2.03	741.186
Q-glu-p	Quercetin glucuronide-pentose	C26H26O17	2		2.18	609.109		2.14	609.109	+
Q-h-p	Quercetin-hexose-pentose	C26H28O16	2	b	2.21	595.13		12.16	595.13	+
K-rut-p	Kaempferol-rutinoside-pentose	C32H38O19	2		2.29	725.192		2.23	725.191
I-rut-p	Isorhamnetin-rutinoside-pentose	C33H40O20	2		2.3	755.202		2.3	755.201
Q-rut	Quercetin-3-O-rutinoside	C27H30O16	1,2		2.34	609.145		2.29	609.145	-
Q-glu	Quercetin-3-O-glucuronide	C21H18O13	1,2	b	2.41	477.067		2.37	477.067	+
Q-glo	Quercetin-3-O-glucoside	C21H20O12	1,2	b	2.43	463.087		2.39	463.088
K-rut	Kaempferol-3-O-rutinoside	C27H30O15	1,2	b	2.53	593.15		2.5	593.15	-
I-rut	Isorhamnetin-3-O-rutinoside	C28H32O16	1,2		2.57	623.16		2.55	623.16	-
Q-ara	Quercetin-3-O-arabinopyranoside	C20H18O11	1,2		2.58	433.077		2.55	433.077
K-glu	Kaempferol-glycuronide	C21H18O12	2	b	2.61	461.072		2.61	461.072
Q-rha	Quercetin-rhamnoside	C21H20O11	2	b	2.63	447.093		2.62	447.093
I-glo	Isorhamnetin-glycoside	C22H22O12	2		2.66	477.103		2.66	477.103
I-glu	Isorhamnetin-glycuronide	C22H20O13	2	b	2.68	491.082		2.69	491.083
I-ac-h	Isorhamnetin acetyl-hexose	C24H24O13	2		2.84	519.114		2.84	519.114
I-rha	Isorhamnetin-rhamnoside	C22H22O11	2		2.82	461.108		2.83	461.108
Note: Compounds were defined by their retention time (tR) and exact mass in negative mode (M-H)- following methods described in Caseys et al. [1]. The identification of compounds was assessed by analytical standards (1) or by tandem high-resolution mass spectrometry (2); derivatives were documented as (a) presence of formic acid adducts, (b) presence of dimers. Phenotypic interspecific differenti…
